# Supplementary material for: Quantitative nuclear histomorphometric features are predictive of Oncotype DX risk categories in ductal carcinoma in situ: preliminary findings
Source: Springer Nature journal article supplement (doi:10.1186/s13058-019-1200-6), 2019-10-17

High ODx risk category (> 54)

ODx DCIS score: 70

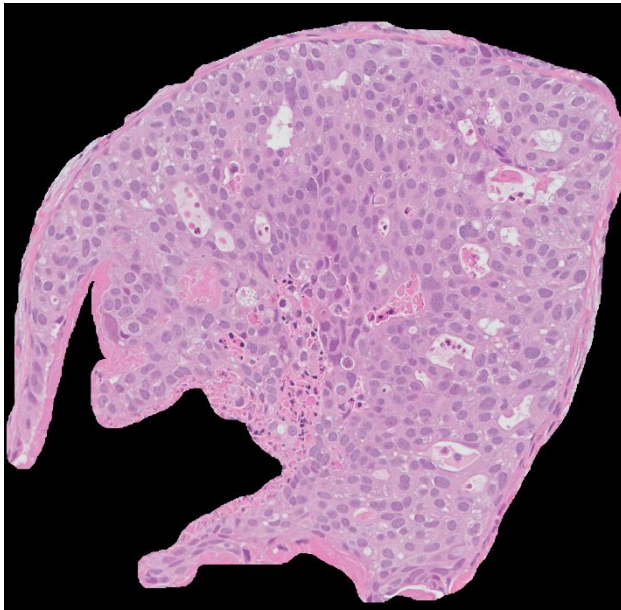

ODx DCIS score: 73

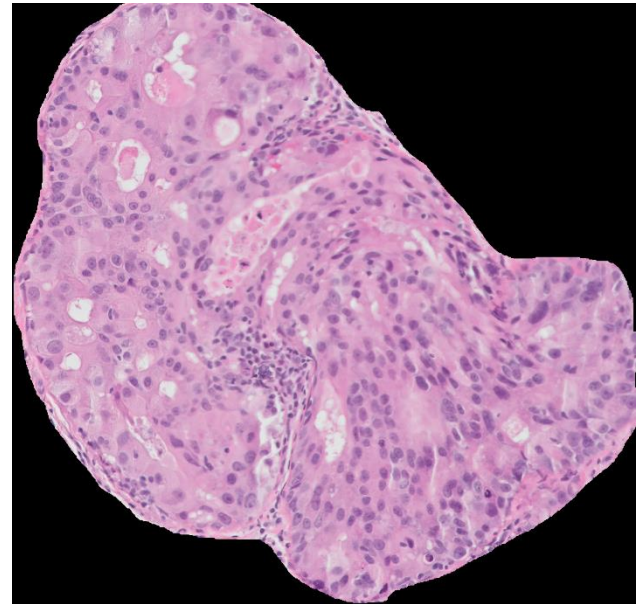

ODx DCIS score: 77

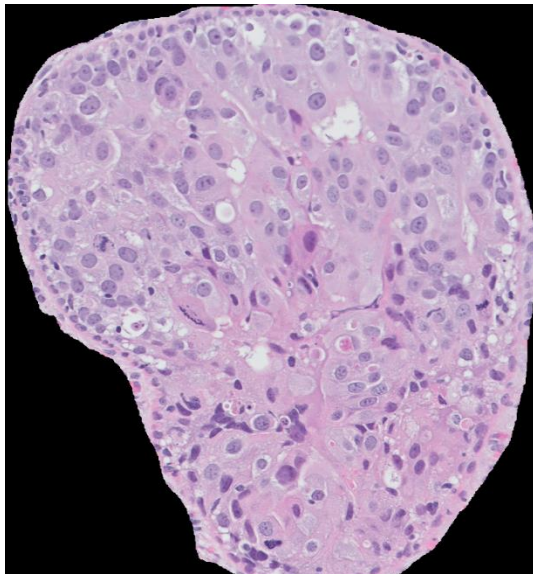

ODx DCIS score: 57

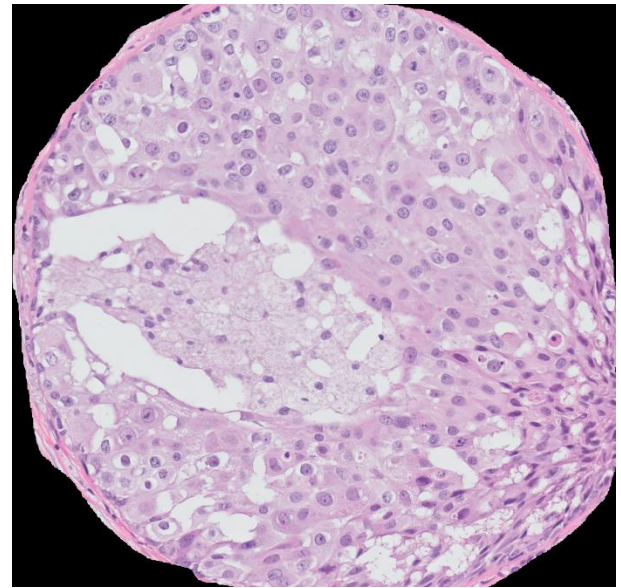

Intermediate ODx risk category (39 ~ 54)

ODx DCIS score: 50

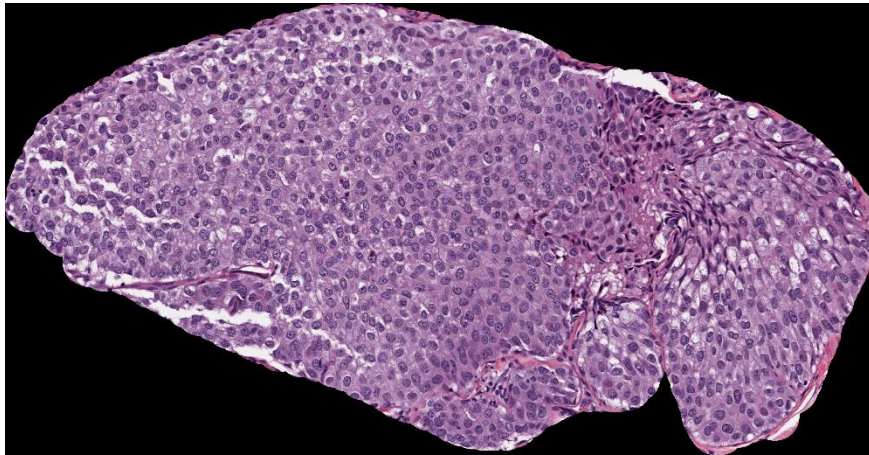

ODx DCIS score: 44

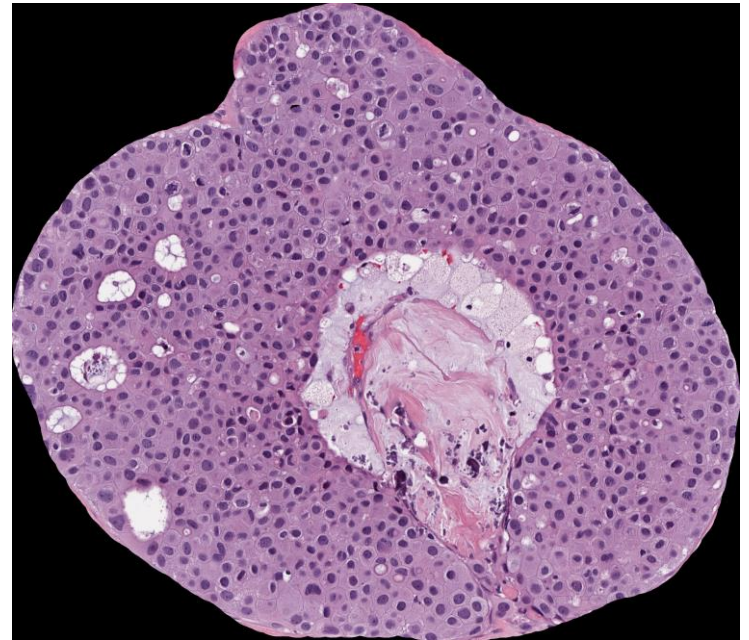

ODx DCIS score: 46

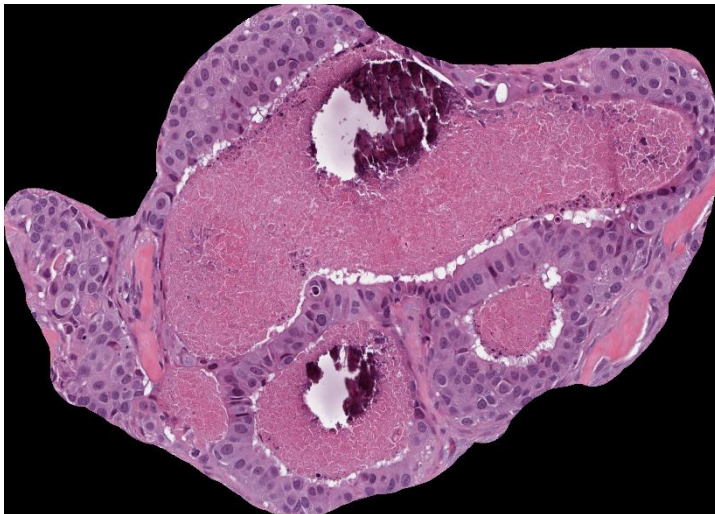

ODx DCIS score: 53

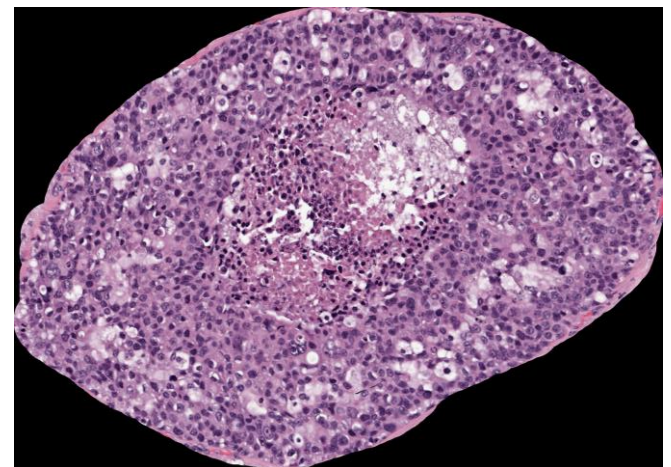

Low ODx risk category (<39)

ODx DCIS score: 0

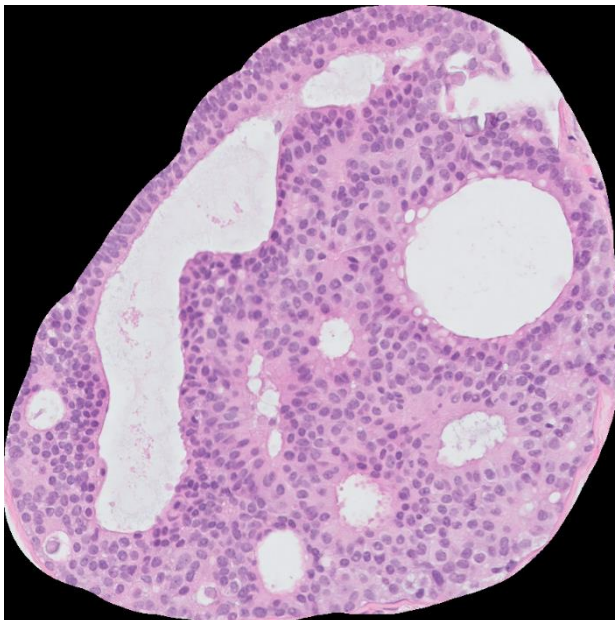

ODx DCIS score: 34

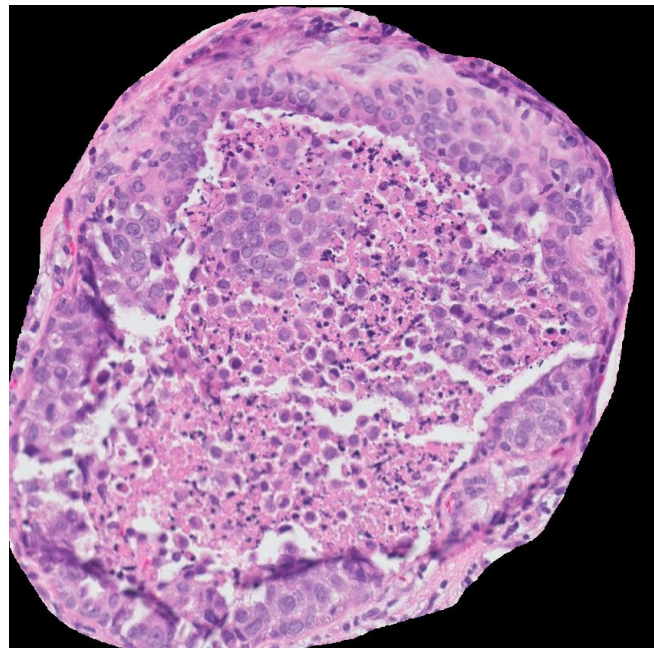

ODx DCIS score: 0

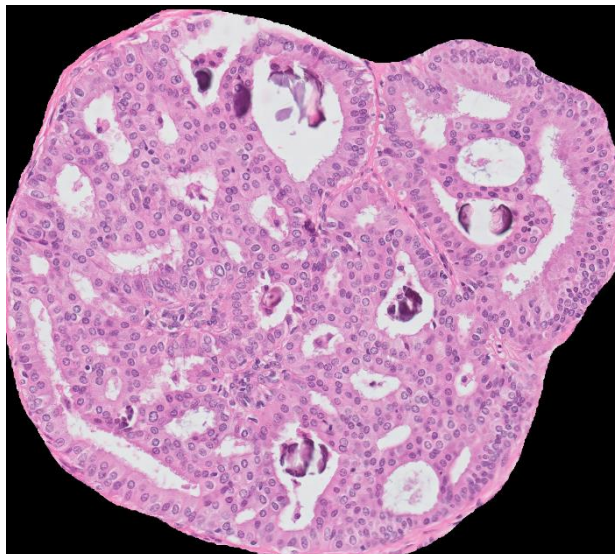

ODx DCIS score: 0

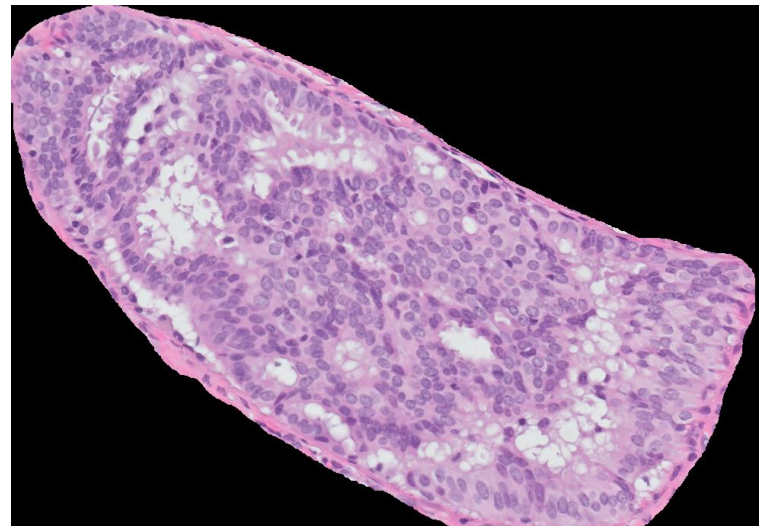

Supplement: MOESM3 [file 17284460]
