# Supplementary material for: Quantitative nuclear histomorphometric features are predictive of Oncotype DX risk categories in ductal carcinoma in situ: preliminary findings
Source: Breast Cancer Res. 2019 Oct 17;21:114. doi: 10.1186/s13058-019-1200-6 (PMC6798488; doi:10.1186/s13058-019-1200-6)
Supplement: Supplementary file 4 — Additional file 4: Section S4. name list for all the extracted nuclear histomorphometric features. [file 13058_2019_1200_MOESM4_ESM.xlsx]

## Sheet: Sheet1
Voronoi: Area Standard Deviation	Shape: Mean Area Ratio	CORE: mean tensor contrast_energy	CCG: Number of Nodes	Haralick: mean intensity contrast_energy
Voronoi: Area Average	Shape: Mean Distance Ratio	CORE: standard deviation tensor contrast_energy	CCG: Number of Edges	Haralick: standard deviation intensity contrast_energy
Voronoi: Area Minimum / Maximum	Shape: Mean Standard Deviation of Distance	CORE: range tensor contrast_energy	CCG: Average Degree	Haralick: mean intensity contrast_inverse_moment
Voronoi: Area Disorder	Shape: Mean Variance of Distance	CORE: mean tensor contrast_inverse_moment	CCG: Average Eccentricity	Haralick: standard deviation intensity contrast_inverse_moment
Voronoi: Perimeter Standard Deviation	Shape: Mean Long/Short Distance Ratio	CORE: standard deviation tensor contrast_inverse_moment	CCG: Diameter	Haralick: mean intensity contrast_ave
Voronoi: Perimeter Average	Shape: Mean Perimeter Ratio	CORE: range tensor contrast_inverse_moment	CCG: Radius	Haralick: standard deviation intensity contrast_ave
Voronoi: Perimeter Minimum / Maximum	Shape: Mean Smoothness	CORE: mean tensor contrast_ave	CCG: Average Eccentricity 90\%	Haralick: mean intensity contrast_var
Voronoi: Perimeter Disorder	Shape: Mean Invariant Moment 1	CORE: standard deviation tensor contrast_ave	CCG: Diameter 90\%	Haralick: standard deviation intensity contrast_var
Voronoi: Chord Standard Deviation	Shape: Mean Invariant Moment 2	CORE: range tensor contrast_ave	CCG: Radius 90\%	Haralick: mean intensity contrast_entropy
Voronoi: Chord Average	Shape: Mean Invariant Moment 3	CORE: mean tensor contrast_var	CCG: Average Path Length	Haralick: standard deviation intensity contrast_entropy
Voronoi: Chord Minimum / Maximum	Shape: Mean Invariant Moment 4	CORE: standard deviation tensor contrast_var	CCG: Clustering Coefficient C	Haralick: mean intensity intensity_ave
Voronoi: Chord Disorder	Shape: Mean Invariant Moment 5	CORE: range tensor contrast_var	CCG: Clustering Coefficient D	Haralick: standard deviation intensity intensity_ave
Delaunay: Side Length Minimum / Maximum	Shape: Mean Invariant Moment 6	CORE: mean tensor contrast_entropy	CCG: Clustering Coefficient E	Haralick: mean intensity intensity_variance
Delaunay: Side Length Standard Deviation	Shape: Mean Invariant Moment 7	CORE: standard deviation tensor contrast_entropy	CCG: Number of connected components	Haralick: standard deviation intensity intensity_variance
Delaunay: Side Length Average	Shape: Mean Fractal Dimension	CORE: range tensor contrast_entropy	CCG: giant connected component ratio	Haralick: mean intensity intensity_entropy
Delaunay: Side Length Disorder	Shape: Mean Fourier Descriptor 1	CORE: mean tensor intensity_ave	CCG: average connected component size	Haralick: standard deviation intensity intensity_entropy
Delaunay: Triangle Area Minimum / Maximum	Shape: Mean Fourier Descriptor 2	ORE: standard deviation tensor intensity_ave	CCG: number isolated nodes	Haralick: mean intensity entropy,
Delaunay: Triangle Area Standard Deviation	Shape: Mean Fourier Descriptor 3	CORE: range tensor intensity_ave	CCG: percentage isolated nodes	Haralick: standard deviation intensity entropy,
Delaunay: Triangle Area Average	Shape: Mean Fourier Descriptor 4	CORE: mean tensor intensity_variance	CCG: number end nodes	Haralick: mean intensity energy
Delaunay: Triangle Area Disorder	Shape: Mean Fourier Descriptor 5	CORE: standard deviation tensor intensity_variance	CCG: percentage end nodes	Haralick: standard deviation intensity energy
Minimum Spanning Tree: Edge Length Average	Shape: Mean Fourier Descriptor 6	CORE: range tensor intensity_variance	CCG: number central nodes	Haralick: mean intensity correlation
Minimum Spanning Tree: Edge Length Standard Deviation	Shape: Mean Fourier Descriptor 7	CORE: mean tensor intensity_entropy	CCG: percentage central nodes	Haralick: standard deviation intensity correlation
Minimum Spanning Tree: Edge Length Minimum / Maximum	Shape: Mean Fourier Descriptor 8	CORE: standard deviation tensor intensity_entropy	CCG: mean edge length	Haralick: mean intensity information_measure1
Minimum Spanning Tree: Edge Length Disorder	Shape: Mean Fourier Descriptor 9	CORE: range tensor intensity_entropy	CCG: standard deviation edge length	Haralick: standard deviation intensity information_measure1
Arch: Area of polygons	Shape: Mean Fourier Descriptor 10	CORE: mean tensor entropy,	CCG: skewness edge length	Haralick: mean intensity information_measure2
Arch: Number of Polygons	Shape: Standard Deviation Area Ratio	CORE: standard deviation tensor entropy,	CG: kurtosis edge length	Haralick: standard deviation intensity information_measure2
Arch: Density of Polygons	Shape: Standard Deviation Distance Ratio	CORE: range tensor entropy,
Arch: Average distance to 3 Nearest Neighbors	Shape: Standard Deviation Standard Deviation of Distance	CORE: mean tensor energy
Arch: Average distance to 5 Nearest Neighbors	Shape: Standard Deviation Variance of Distance	CORE: standard deviation tensor energy
Arch: Average distance to 7 Nearest Neighbors	Shape: Standard Deviation Long/Short Distance Ratio	CORE: range tensor energy
Arch: Standard Deviation distance to 3 Nearest Neighbors	Shape: Standard Deviation Perimeter Ratio	CORE: mean tensor correlation
Arch: Standard Deviation distance to 5 Nearest Neighbors	Shape: Standard Deviation Smoothness	CORE: standard deviation tensor correlation
Arch: Standard Deviation distance to 7 Nearest Neighbors	Shape: Standard Deviation Invariant Moment 1	CORE: range tensor correlation
Arch: Disorder of distance to 3 Nearest Neighbors	Shape: Standard Deviation Invariant Moment 2	CORE: mean tensor information_measure1
Arch: Disorder of distance to 5 Nearest Neighbors	Shape: Standard Deviation Invariant Moment 3	CORE: standard deviation tensor information_measure1
Arch: Disorder of distance to 7 Nearest Neighbors	Shape: Standard Deviation Invariant Moment 4	CORE: range tensor information_measure1
Arch: Avg. Nearest Neighbors in a 10 Pixel Radius	Shape: Standard Deviation Invariant Moment 5	CORE: mean tensor information_measure2
Arch: Avg. Nearest Neighbors in a 20 Pixel Radius	Shape: Standard Deviation Invariant Moment 6	CORE: standard deviation tensor information_measure2
Arch: Avg. Nearest Neighbors in a 30 Pixel Radius	Shape: Standard Deviation Invariant Moment 7	CORE: range tensor information_measur
Arch: Avg. Nearest Neighbors in a 40 Pixel Radius	Shape: Standard Deviation Fractal Dimension
Arch: Avg. Nearest Neighbors in a 50 Pixel Radius	Shape: Standard Deviation Fourier Descriptor 1
Arch: Standard Deviation Nearest Neighbors in a 10 Pixel Radius	Shape: Standard Deviation Fourier Descriptor 2
Arch: Standard Deviation Nearest Neighbors in a 20 Pixel Radius	Shape: Standard Deviation Fourier Descriptor 3
Arch: Standard Deviation Nearest Neighbors in a 30 Pixel Radius	Shape: Standard Deviation Fourier Descriptor 4
Arch: Standard Deviation Nearest Neighbors in a 40 Pixel Radius	Shape: Standard Deviation Fourier Descriptor 5
Arch: Standard Deviation Nearest Neighbors in a 50 Pixel Radius	Shape: Standard Deviation Fourier Descriptor 6
Arch: Disorder of Nearest Neighbors in a 10 Pixel Radius	Shape: Standard Deviation Fourier Descriptor 7
Arch: Disorder of Nearest Neighbors in a 20 Pixel Radius	Shape: Standard Deviation Fourier Descriptor 8
Arch: Disorder of Nearest Neighbors in a 30 Pixel Radius	Shape: Standard Deviation Fourier Descriptor 9
Arch: Disorder of Nearest Neighbors in a 40 Pixel Radius	Shape: Standard Deviation Fourier Descriptor 10
Arch: Disorder of Nearest Neighbors in a 50 Pixel Radius	Shape: Median Area Ratio
	Shape: Median Distance Ratio
	Shape: Median Standard Deviation of Distance
	Shape: Median Variance of Distance
	Shape: Median Long/Short Distance Ratio
	Shape: Median Perimeter Ratio
	Shape: Median Smoothness
	Shape: Median Invariant Moment 1
	Shape: Median Invariant Moment 2
	Shape: Median Invariant Moment 3
	Shape: Median Invariant Moment 4
	Shape: Median Invariant Moment 5
	Shape: Median Invariant Moment 6
	Shape: Median Invariant Moment 7
	Shape: Median Fractal Dimension
	Shape: Median Fourier Descriptor 2
	Shape: Median Fourier Descriptor 3
	Shape: Median Fourier Descriptor 4
	Shape: Median Fourier Descriptor 5
	Shape: Median Fourier Descriptor 6
	Shape: Median Fourier Descriptor 7
	Shape: Median Fourier Descriptor 8
	Shape: Median Fourier Descriptor 9
	Shape: Median Fourier Descriptor 10
	Shape: Min / Max Area Ratio
	Shape: Min / Max Distance Ratio
	Shape: Min / Max Standard Deviation of Distance
	Shape: Min / Max Variance of Distance
	Shape: Min / Max Long/Short Distance Ratio
	Shape: Min / Max Perimeter Ratio
	Shape: Min / Max Smoothness
	Shape: Min / Max Invariant Moment 1
	Shape: Min / Max Invariant Moment 2
	Shape: Min / Max Invariant Moment 3
	Shape: Min / Max Invariant Moment 4
	Shape: Min / Max Invariant Moment 5
	Shape: Min / Max Invariant Moment 6
	Shape: Min / Max Invariant Moment 7
	Shape: Min / Max Fractal Dimension
	Shape: Min / Max Fourier Descriptor 1
	Shape: Min / Max Fourier Descriptor 2
	Shape: Min / Max Fourier Descriptor 3
	Shape: Min / Max Fourier Descriptor 4
	Shape: Min / Max Fourier Descriptor 5
	Shape: Min / Max Fourier Descriptor 6
	Shape: Min / Max Fourier Descriptor 7
	Shape: Min / Max Fourier Descriptor 8
	Shape: Min / Max Fourier Descriptor 9
	Shape: Min / Max Fourier Descriptor 10
NOTE:
Arch: Architecture
CORE: Cell Orientation Entropy Disorder
CCG: Cell Cluster Graph
